# Supplementary material for: Epidemiological pattern of death and causes in immigrants of Northeast Iran during the 2013-2023: a cross-sectional study
Source: Research Square preprint supplement (doi:10.21203/rs.3.rs-6865601/v1), 2025-07-18
Supplement: Supplementary file 1 [file 7c1e1c3db2ffd500026b7104.docx]

**Supplementary Materials:**

| Year | Age | Gender | NCDs | CDs | Maternal/ neonatal | Injuries | Unknown |
| --- | --- | --- | --- | --- | --- | --- | --- |
| 2013 | Under one year | Male | 66.90 | 22.30 | 669.04 | 22.30 | 44.60 |
| 2013 | Under one year | Female | 70.73 | 23.57 | 424.42 | 0 | 23.57 |
| 2013 | 1-20 years | Male | 13.22 | 4.95 | 0 | 18.18 | 4.95 |
| 2013 | 1-20 years | Female | 13.39 | 3.34 | 1.67 | 21.76 | 6.69 |
| 2013 | 20-40 years | Male | 18.23 | 3.31 | 0 | 46.40 | 6.62 |
| 2013 | 20-40 years | Female | 21.10 | 3.24 | 1.62 | 24.35 | 3.24 |
| 2013 | 40-60 years | Male | 157.41 | 32.29 | 0 | 92.83 | 36.32 |
| 2013 | 40-60 years | Female | 129.75 | 19.22 | 0 | 28.83 | 52.86 |
| 2013 | Over sixty years | Male | 1165.97 | 321.23 | 0 | 142.77 | 404.52 |
| 2013 | Over sixty years | Female | 924.85 | 82.57 | 0 | 0 | 495.45 |
| 2014 | Under one year | Male | 178.41 | 0 | 1181.98 | 0 | 22.30 |
| 2014 | Under one year | Female | 94.31 | 23.57 | 990.33 | 23.57 | 0 |
| 2014 | 1-20 years | Male | 29.75 | 6.61 | 6.61 | 34.71 | 3.30 |
| 2014 | 1-20 years | Female | 6.69 | 0 | 5.02 | 13.39 | 0 |
| 2014 | 20-40 years | Male | 26.51 | 8.28 | 0 | 43.08 | 4.97 |
| 2014 | 20-40 years | Female | 9.74 | 3.24 | 0 | 8.11 | 1.62 |
| 2014 | 40-60 years | Male | 177.59 | 24.21 | 0 | 52.47 | 36.32 |
| 2014 | 40-60 years | Female | 148.97 | 19.22 | 0 | 33.63 | 14.41 |
| 2014 | Over sixty years | Male | 1023.2 | 166.56 | 0 | 107.07 | 142.77 |
| 2014 | Over sixty years | Female | 875.30 | 132.12 | 0 | 66.06 | 33.03 |
| 2015 | Under one year | Male | 156.11 | 111.50 | 1226.58 | 0 | 66.90 |
| 2015 | Under one year | Female | 188.63 | 70.73 | 825.27 | 0 | 70.73 |
| 2015 | 1-20 years | Male | 9.91 | 6.61 | 1.65 | 23.14 | 0 |
| 2015 | 1-20 years | Female | 13.39 | 3.34 | 1.67 | 6.69 | 1.67 |
| 2015 | 20-40 years | Male | 16.57 | 6.62 | 0 | 46.40 | 3.31 |
| 2015 | 20-40 years | Female | 12.99 | 4.87 | 0 | 4.87 | 8.11 |
| 2015 | 40-60 years | Male | 181.63 | 32.29 | 0 | 76.69 | 24.21 |
| 2015 | 40-60 years | Female | 105.72 | 24.02 | 0 | 24.02 | 14.41 |
| 2015 | Over sixty years | Male | 1165.97 | 190.36 | 0 | 142.77 | 118.97 |
| 2015 | Over sixty years | Female | 1189.1 | 330.30 | 0 | 82.57 | 99.09 |
| 2016 | Under one year | Male | 156.11 | 156.11 | 1360.39 | 22.30 | 0 |
| 2016 | Under one year | Female | 117.89 | 70.73 | 1084.64 | 0 | 0 |
| 2016 | 1-20 years | Male | 13.22 | 6.61 | 1.65 | 19.83 | 0 |
| 2016 | 1-20 years | Female | 11.71 | 8.37 | 6.69 | 5.02 | 3.34 |
| 2016 | 20-40 years | Male | 23.20 | 4.97 | 0 | 19.88 | 3.31 |
| 2016 | 20-40 years | Female | 9.74 | 4.87 | 1.62 | 4.87 | 4.87 |
| 2016 | 40-60 years | Male | 217.96 | 32.29 | 0 | 40.36 | 4.03 |
| 2016 | 40-60 years | Female | 168.19 | 48.05 | 0 | 4.80 | 14.41 |
| 2016 | Over sixty years | Male | 1546.69 | 273.64 | 0 | 83.28 | 59.48 |
| 2016 | Over sixty years | Female | 1684.55 | 396.36 | 0 | 49.54 | 82.57 |
| 2017 | Under one year | Male | 66.90 | 44.60 | 1159.67 | 22.30 | 89.20 |
| 2017 | Under one year | Female | 94.31 | 23.57 | 683.80 | 23.57 | 70.73 |
| 2017 | 1-20 years | Male | 13.22 | 1.65 | 3.30 | 13.22 | 0 |
| 2017 | 1-20 years | Female | 10.04 | 1.67 | 1.67 | 5.02 | 5.02 |
| 2017 | 20-40 years | Male | 23.20 | 1.65 | 0 | 41.43 | 1.65 |
| 2017 | 20-40 years | Female | 19.48 | 4.87 | 1.62 | 6.49 | 3.24 |
| 2017 | 40-60 years | Male | 209.88 | 40.36 | 0 | 52.47 | 20.18 |
| 2017 | 40-60 years | Female | 153.77 | 24.02 | 0 | 9.61 | 14.41 |
| 2017 | Over sixty years | Male | 1344.43 | 368.82 | 0 | 95.18 | 35.69 |
| 2017 | Over sixty years | Female | 1519.40 | 429.39 | 0 | 66.06 | 82.57 |
| 2018 | Under one year | Male | 195.48 | 21.72 | 1064.29 | 0 | 130.32 |
| 2018 | Under one year | Female | 185.87 | 46.46 | 813.19 | 0 | 0 |
| 2018 | 1-20 years | Male | 16.44 | 3.28 | 4.93 | 18.08 | 1.64 |
| 2018 | 1-20 years | Female | 3.31 | 3.31 | 1.65 | 4.96 | 0 |
| 2018 | 20-40 years | Male | 45.77 | 10.56 | 0 | 66.89 | 0 |
| 2018 | 20-40 years | Female | 24.03 | 6.86 | 1.71 | 10.30 | 6.86 |
| 2018 | 40-60 years | Male | 374.74 | 61.09 | 0 | 52.95 | 24.43 |
| 2018 | 40-60 years | Female | 237.77 | 29.72 | 0 | 4.95 | 29.72 |
| 2018 | Over sixty years | Male | 2005.84 | 698.23 | 0 | 152.34 | 114.25 |
| 2018 | Over sixty years | Female | 2034.62 | 1017.31 | 0 | 53.54 | 124.93 |
| 2019 | Under one year | Male | 226.86 | 68.05 | 1474.59 | 45.37 | 22.68 |
| 2019 | Under one year | Female | 119.24 | 95.39 | 1192.46 | 23.84 | 0 |
| 2019 | 1-20 years | Male | 31.84 | 12.73 | 4.77 | 19.10 | 3.18 |
| 2019 | 1-20 years | Female | 11.23 | 8.02 | 4.81 | 8.02 | 3.20 |
| 2019 | 20-40 years | Male | 37.33 | 26.66 | 0 | 48 | 1.77 |
| 2019 | 20-40 years | Female | 20.40 | 13.60 | 3.40 | 6.80 | 6.80 |
| 2019 | 40-60 years | Male | 369.66 | 102.89 | 0 | 76.21 | 19.05 |
| 2019 | 40-60 years | Female | 319.96 | 74.19 | 0 | 18.54 | 13.91 |
| 2019 | Over sixty years | Male | 2522.36 | 820.07 | 0 | 136.67 | 136.67 |
| 2019 | Over sixty years | Female | 2871.22 | 1019.36 | 0 | 33.97 | 118.92 |
| 2020 | Under one year | Male | 45.41 | 136.23 | 1203.45 | 0 | 249.77 |
| 2020 | Under one year | Female | 70.73 | 141.47 | 1061.07 | 23.57 | 259.37 |
| 2020 | 1-20 years | Male | 15.28 | 9.16 | 3.05 | 25.97 | 1.52 |
| 2020 | 1-20 years | Female | 12.33 | 13.87 | 1.54 | 4.62 | 1.54 |
| 2020 | 20-40 years | Male | 38.46 | 36.71 | 0 | 82.17 | 1.74 |
| 2020 | 20-40 years | Female | 23.00 | 21.36 | 8.21 | 11.50 | 1.64 |
| 2020 | 40-60 years | Male | 393.42 | 262.28 | 0 | 73.28 | 30.85 |
| 2020 | 40-60 years | Female | 316.49 | 229.34 | 4.58 | 4.58 | 22.93 |
| 2020 | Over sixty years | Male | 3991.44 | 2221.43 | 0 | 166.31 | 344.49 |
| 2020 | Over sixty years | Female | 3684.04 | 2171.81 | 0 | 16.08 | 128.70 |
| 2021 | Under one year | Male | 104.82 | 262.05 | 1126.83 | 0 | 209.64 |
| 2021 | Under one year | Female | 104.43 | 182.76 | 1462.14 | 0 | 78.32 |
| 2021 | 1-20 years | Male | 15.01 | 15.01 | 1.50 | 22.52 | 1.50 |
| 2021 | 1-20 years | Female | 15.21 | 4.56 | 1.52 | 10.65 | 0 |
| 2021 | 20-40 years | Male | 48.51 | 44.91 | 0 | 82.64 | 5.39 |
| 2021 | 20-40 years | Female | 28.25 | 48.19 | 3.32 | 11.63 | 0 |
| 2021 | 40-60 years | Male | 362.90 | 370.09 | 0 | 93.42 | 10.77 |
| 2021 | 40-60 years | Female | 386.59 | 327.11 | 0 | 16.99 | 12.74 |
| 2021 | Over sixty years | Male | 3300.90 | 2983.93 | 10.93 | 142.09 | 131.16 |
| 2021 | Over sixty years | Female | 3232.38 | 3246.94 | 0 | 58.24 | 131.04 |
| 2022 | Under one year | Male | 106.79 | 384.45 | 1687.31 | 0 | 234.94 |
| 2022 | Under one year | Female | 43.88 | 175.55 | 1097.21 | 21.94 | 285.27 |
| 2022 | 1-20 years | Male | 15.58 | 17.00 | 0 | 21.25 | 1.41 |
| 2022 | 1-20 years | Female | 13.03 | 20.27 | 0 | 7.24 | 0 |
| 2022 | 20-40 years | Male | 48.25 | 19.96 | 1.66 | 71.55 | 6.65 |
| 2022 | 20-40 years | Female | 17.28 | 12.56 | 1.57 | 9.42 | 3.14 |
| 2022 | 40-60 years | Male | 287.72 | 112.44 | 0 | 95.90 | 3.30 |
| 2022 | 40-60 years | Female | 246.89 | 82.29 | 0 | 14.96 | 0 |
| 2022 | Over sixty years | Male | 1846.32 | 823.60 | 0 | 54.30 | 9.05 |
| 2022 | Over sixty years | Female | 2183.40 | 1252.58 | 0 | 68.94 | 22.98 |
| 2023 | Under one year | Male | 181.36 | 90.68 | 1201.54 | 0 | 294.71 |
| 2023 | Under one year | Female | 139.86 | 46.62 | 1608.39 | 0 | 279.72 |
| 2023 | 1-20 years | Male | 22.33 | 10.50 | 5.25 | 17.07 | 1.31 |
| 2023 | 1-20 years | Female | 10.67 | 12.01 | 1.33 | 6.67 | 0 |
| 2023 | 20-40 years | Male | 64.07 | 38.44 | 1.60 | 59.27 | 3.20 |
| 2023 | 20-40 years | Female | 31.09 | 11.84 | 1.48 | 7.40 | 4.44 |
| 2023 | 40-60 years | Male | 257.88 | 91.20 | 0 | 56.60 | 6.28 |
| 2023 | 40-60 years | Female | 264.90 | 90.62 | 0 | 10.45 | 3.48 |
| 2023 | Over sixty years | Male | 2079.75 | 902.37 | 0 | 111.72 | 42.97 |
| 2023 | Over sixty years | Female | 2081.98 | 1186.62 | 0 | 75.51 | 21.57 |

**Table 1.** Age/ gender standardized mortality rates during the years 2013-2023
